# Supplementary material for: Similarity of salivary microbiome in parents and adult children
Source: PeerJ journal article supplement (doi:10.7717/peerj.8799), 2020-04-09
Supplement: peerj_codes.zip [file peerj_codes.zip]

```
#####----- preprocessing outside mothur
```

```
## Unzip the .gz files
```

```
gunzip *.gz
```

```
## Trim primers
```

```
# check forward primer (found)
```

```
cat saliva_S7_L001_R1_001.fastq | grep CCTACGGGAGGCAGCAG | wc -l
```

```
cat saliva_S7_L001_R2_001.fastq | grep CCTACGGGAGGCAGCAG | wc -l
```

```
cat saliva_S7_L001_R1_001.fastq | grep GGACTACCAGGGTATCTAAT | wc -l
```

```
cat saliva_S7_L001_R2_001.fastq | grep GGACTACCAGGGTATCTAAT | wc -l
```

```
# remove forward primer (module load biokit has it)
```

```
for i in $(ls *.fastq)
```

```
do
```

```
cutadapt -b CCTACGGGAGGCAGCAG -o ${i%}.noprimer ${i%}
```

```
done
```

```
# Remove the old files
```

```
rm -rf *.fastq
```

```
#The output files will have no primer at the end. Remove those!
```

```
for file in *.noprimer; do
```

```
mv -- "$file" "${file%.noprimer}"
```

```
done
```

```
# remove reverse primer
```

```
for i in $(ls *.fastq)
```

```
do
```

```
cutadapt -b GGACTACCAGGGTATCTAAT -o ${i%}.noprimer ${i%}
```

done

```
rm -rf *.fastq
for file in *.noprimer; do
mv -- "$file" "${file%.noprimer}"
done
```

*## verify*

```
cat saliva_S7_L001_R1_001.fastq | grep CCTACGGGAGGCAGCAG | wc -l
cat saliva_S7_L001_R2_001.fastq | grep GGACTACCAGGGTATCTAAT | wc -l
```

*##Trim bad quality sequence. Note minlen – we need at least 250 long fragments (previously used min 200 bp)*

```
for f1 in *_R1_001.fastq
do
f2="${f1/R1/R2}"
trimmomatic PE -threads 8 -phred33 $f1 $f2 ${f1}_paired.fastq $
${f1}_unpaired.fastq ${f2}_paired.fastq ${f2}_unpaired.fastq
ILLUMINACLIP:/appl/bio/trimmomatic/adapters/TruSeq3-PE.fa:
2:30:10 LEADING:3 TRAILING:3 SLIDINGWINDOW:4:15 MINLEN:250
done
```

*# remove unpaired ones and old ones*

```
rm -rf *_unpaired.fastq
```

*#Remove the '\_paired.fastq' extension from the file names*

```
for file in *_paired.fastq; do
mv -- "$file" "${file%_paired.fastq}"
done
```

*##### mothur part #####*

*#####----- create stability file*

```
mothur > make.file(inputdir=mother_child_raw, type=fastq,
prefix=stability)
```

*# modified in txt file to add sample ids*

#####----- Reducing sequencing and PCR errors

##--merge F and R sequences

```
mothur > make.contigs(file=/wrk/mishra/mother_child/  
mother_child_raw/stability.paired.files, processors=8)
```

## check summary

```
mothur > summary.seqs(fasta=stability.paired.trim.contigs.fasta)
```

##### filter out badly merged reads

```
mothur > screen.seqs(fasta=stability.paired.trim.contigs.fasta,  
group=stability.paired.contigs.groups, maxambig=0,  
maxlength=480,minlength=400)
```

## check summary

```
mothur > summary.seqs()
```

##### get unique sequences #####

```
mothur >
```

```
unique.seqs(fasta=stability.paired.trim.contigs.good.fasta)
```

# 176042 (all sequences) 36663 (unique sequences)

Output File Names:

stability.paired.trim.contigs.good.names

stability.paired.trim.contigs.good.unique.fasta

##### make count table #####

```
mothur >
```

```
count.seqs(name=stability.paired.trim.contigs.good.names,  
group=stability.paired.contigs.good.groups)
```

Output File Names:

stability.paired.trim.contigs.good.count\_table

```
mothur >
```

```
summary.seqs(count=stability.paired.trim.contigs.good.count_table)
```

*##### align to reference sequences #####*

```
mothur > align.seqs(candidate=ecoli.fasta,  
template=silva.bacteria.fasta)
```

Output File Names:  
ecoli.align  
ecoli.align.report

*## now check the start and end positions*  
mothur > summary.seqs(fasta=ecoli.align)

*### Now customize silva using above start and end position*

```
mothur > pcr.seqs(fasta=silva.gold.align.fasta, start=6388,  
end=43116, keepdots=F, processors=8)
```

Output File Names:  
silva.gold.align.pcr.fasta (it is the customized silva align  
data)

*### check summary*

```
mothur > summary.seqs(fasta=silva.gold.align.pcr.fasta)
```

```
mothur > rename.file(input=silva.gold.align.pcr.fasta,  
new=silva.v3v4.fasta)
```

*## alignment (*

```
mothur >  
align.seqs(fasta=stability.paired.trim.contigs.good.unique.fasta  
, reference=silva.v3v4.fasta)
```

```
#!/bin/bash -l  
#SBATCH -J mothur  
#SBATCH -o motur.stdout  
#SBATCH -e motur.stderr  
#SBATCH -n 5  
#SBATCH -t 12:00:00
```

```
#SBATCH --nodes=1
#SBATCH --mem-per-cpu=23000
module load biokit
mothur mothur_task.txt
```

```
mothur >
summary.seqs(fasta=stability.paired.trim.contigs.good.unique.alig
n, count=stability.paired.trim.contigs.good.count_table)
```

```
## filter out deviants
```

```
mothur >
screen.seqs(fasta=stability.paired.trim.contigs.good.unique.alig
n, count=stability.paired.trim.contigs.good.count_table,
summary=stability.paired.trim.contigs.good.unique.summary,
start=40, end=17056, maxhomop=8)
```

```
mothur > summary.seqs(fasta=current, count=current)
```

```
## filter over hang of the alignments
```

```
mothur >
filter.seqs(fasta=stability.paired.trim.contigs.good.unique.good
.align, vertical=T, trump=.)
```

```
Length of filtered alignment: 683
Number of columns removed: 36045
Length of the original alignment: 36728
Number of sequences used to construct filter: 37899
```

```
mothur >
unique.seqs(fasta=stability.paired.trim.contigs.good.unique.good
.filter.fasta,
count=stability.paired.trim.contigs.good.good.count_table)
```

```
# precluster
```

```
mothur >
pre.cluster(fasta=stability.paired.trim.contigs.good.unique.good
.filter.unique.fasta,
count=stability.paired.trim.contigs.good.unique.good.filter.coun
t_table, diffs=2)
```

```
# rm chimera
```

```
# from count table
mothur >
chimera.vsearch(fasta=stability.paired.trim.contigs.good.unique.
good.filter.unique.precluster.fasta,
count=stability.paired.trim.contigs.good.unique.good.filter.uniq
ue.precluster.count_table, dereplicate=t)
```

```
# from fasta file
mothur >
remove.seqs(fasta=stability.paired.trim.contigs.good.unique.good
.filter.unique.precluster.fasta,
accnos=stability.paired.trim.contigs.good.unique.good.filter.uni
que.precluster.denovo.vsearch.accnos)
```

```
mothur > summary.seqs(fasta=current, count=current)
```

```
# rm Archaea, chloroplasts, and mitochondria. Download
'Trainset16_022016.pds' version 16 from https://mothur.org/wiki/
RDP_reference_files
```

```
mothur >
classify.seqs(fasta=stability.paired.trim.contigs.good.unique.go
od.filter.unique.precluster.pick.fasta,
count=stability.paired.trim.contigs.good.unique.good.filter.uniq
ue.precluster.denovo.vsearch.pick.count_table,
reference=trainset16_022016.pds.fasta,
taxonomy=trainset16_022016.pds.tax, cutoff=80)
```

```
# rm undesirables
mothur >
remove.lineage(fasta=stability.paired.trim.contigs.good.unique.g
ood.filter.unique.precluster.pick.fasta,
count=stability.paired.trim.contigs.good.unique.good.filter.uniq
ue.precluster.denovo.vsearch.pick.count_table,
taxonomy=stability.paired.trim.contigs.good.unique.good.filter.u
nique.precluster.pick.pds.wang.taxonomy, taxon=Chloroplast-
Mitochondria-unknown-Archaea-Eukaryota)
```

```
## remove all contaminants in file 'contaminants_filter2.txt'.
Rename the outputs to make it easier as there will be many
repetations due to many contaminants
```

```
# repeat this for each bacteria in the contaminants file
```

```
mothur > remove.lineage(fasta=data.fasta,  
count=data.count_table, taxonomy=data.taxonomy,  
taxon='Bacteria;Firmicutes;Erysipelotrichia;Erysipelotrichales;E  
rysipelotrichaceae;Sharpea;')
```

```
#####  
#####  
##### analysis part  
#####  
#####  
#####
```

*## OTU*

```
mothur > dist.seqs(fasta=data.fasta, cutoff=0.03) # OTUs formed  
with distance no larger than 3% (i.e, 97% similarity)
```

Output File Names:  
data.dist

```
mothur > cluster(column=data.dist, count=data.count_table)
```

Output File Names:  
data.opti\_mcc.list  
data.opti\_mcc.steps  
data.opti\_mcc.sensspec

*# number of seqs in each OTUs*

```
mothur > make.shared(list=data.opti_mcc.list,  
count=data.count_table, label=0.03)
```

Output File Names:  
data.opti\_mcc.shared

*# taxonomy for each otu*

```
mothur > classify.otu(list=data.opti_mcc.list,  
count=data.count_table, taxonomy=data.taxonomy, label=0.03)
```

Output File Names:  
data.opti\_mcc.0.03.cons.taxonomy  
data.opti\_mcc.0.03.cons.tax.summary

```

# number of sequences in each sample
mothur > count.groups(shared=data.opti_mcc.shared)

mothur > sub.sample(shared=data.opti_mcc.shared, size=3157)

#####
#####
##### beta diversity
#####
#####

# calculate similarity
mothur > dist.shared(shared=data.opti_mcc.shared, calc=thetayc-
jclass, subsample=3157)

## dendrogram to describe the similarity of the samples to each
other. We will generate a dendrogram using the jclass and
thetayc calculators within the tree.shared command

mothur > tree.shared(phylip=data.opti_mcc.thetayc.
0.03.lt.ave.dist)

# Using the parsimony command let's look at the pairwise
comparisons. 'family.design' below.
mothur > parsimony(tree=data.opti_mcc.thetayc.0.03.lt.ave.tre,
group=family.design, groups=all)

mothur > amova(phylip=data.opti_mcc.thetayc.0.03.lt.ave.dist,
design=family.design)

mothur > homova(phylip=data.opti_mcc.thetayc.0.03.lt.ave.dist,
design=family.design)

# plot abundance data

```

```

abun.dat <- read.table("data.opti_mcc.shared",header=T)
rownames(abun.dat) <- abun.dat[,2]
abun.dat <- abun.dat[,-c(1:3)]
abun.dat <- t(abun.dat)
dim(abun.dat) # [1] 312 25

# remove low abundant OTUs and consider only major abundant OTUs
ind <- as.numeric(which(rowSums(abun.dat)<50))
abun.dat <- abun.dat[-ind,]
abun.dat <- abun.dat[,-c(5,6)]
sample.labels <-
c(1,1,1,1,1,1,2,2,2,2,1,1,1,1,1,1,1,1,2,2,1,1)
design <- model.matrix(~factor(sample.labels))
# voom transformation
y <- voom(abun.dat,design,plot=TRUE) # plot looked okay
plotMDS(y,xlim=c(-2.5,2.5),col=sample.labels)

```

##### grouping only core families

```

#core_A <- c("3a","3c","4a","4c","7a","7c","8c")
#core_B <- c("1a","1c","2a","4a","4c","5a","6b","6c")

sample.labels.core <-
c(0,0,0,0,0,0,0,0,2,2,2,1,1,1,1,2,2,2,1,1,1,0,0) # THE ONES NOT
IN CORE ARE MARKED 0.
plotMDS(y,xlim=c(-2.5,2.5),col=sample.labels.core)

```

##### Venn diagram showing the unique and shared OTUs  
between parents and children in core families #####  
## use 'data.opti\_mcc.shared' file generated by make.shared  
command.

Caption: OTUs defined at 97% sequence similarity. (A) Venn  
diagram for mother and children; (B) Venn diagram for father and  
children;

```

data.shared <- read.table("data.opti_mcc.shared",header=TRUE)
data.shared$Group <- as.character(data.shared$Group)

```

## Nuclear family A (1,2,(4,5,6)) and B (3,4,(7,8)) # ones in  
bracket are children.

```

data.shared$Group[c(11,12)] <-
c("CoreA_Father_rep1","CoreA_Father_rep2")
data.shared$Group[13] <- c("CoreA_Mother")
data.shared$Group[c(16,17,18,19,20)] <-
c("CoreA_Daughter1_rep1","CoreA_Daughter1_rep2","CoreA_Daughter2",
,"CoreA_Daughter3_rep1","CoreA_Daughter3_rep2")

```

*# make duplicate of data.shared as sample '4' is present in both core families*

```

data.shared.cp <- read.table("data.opti_mcc.shared",header=TRUE)
data.shared.cp$Group <- as.character(data.shared.cp$Group)

```

```

data.shared.cp$Group[c(14,15)] <-
c("CoreB_Father_rep1","CoreB_Father_rep2")
data.shared.cp$Group[c(16,17)] <-
c("CoreB_Mother_rep1","CoreB_Mother_rep2")
data.shared.cp$Group[c(21,22,23)] <-
c("CoreB_Daughter_rep1","CoreB_Daughter_rep2","CoreB_Son")

```

*# mothur > venn(shared=data.shared, groups=CoreA\_Father\_rep1-  
CoreA\_Father\_rep2-CoreA\_Mother-CoreA\_Daughter1\_rep1-  
CoreA\_Daughter1\_rep2-CoreA\_Daughter2-CoreA\_Daughter3\_rep1-  
CoreA\_Daughter3\_rep2) ## this will generate plots for all  
possible combination as mothur can have only 4 groups at a time  
for venn. Take average of counts to avoid too many combinatorics  
problem. Moreover, different overlap with different replicates  
was observed. So, averaging the replicates can be a better idea.*

*# take average of replicates*

```

abun.shared <- data.shared[,c(4:315)]
coreA_father_avg <-
colMeans(rbind(abun.shared[11,],abun.shared[12,]))
coreA_father_avg <- c(0.03,"coreA_father_avg",
312,coreA_father_avg)
data.shared <- rbind(data.shared,coreA_father_avg) # adding row
of averaged data

```

```

coreA_Daughter1_avg <-
colMeans(rbind(abun.shared[16,],abun.shared[17,]))
coreA_Daughter1_avg <- c(0.03,"coreA_Daughter1_avg",
312,coreA_Daughter1_avg)
data.shared <- rbind(data.shared,coreA_Daughter1_avg)

```

```

coreA_Daughter3_avg <-
colMeans(rbind(abun.shared[19,],abun.shared[20,]))
coreA_Daughter3_avg <- c(0.03,"coreA_Daughter3_avg",
312,coreA_Daughter3_avg)
data.shared <- rbind(data.shared,coreA_Daughter3_avg)

# now make sure data types are intact
data.shared$label <- as.numeric(data.shared$label)
data.shared$Group <- factor(data.shared$Group)
for(i in 3:315){
  data.shared[,i] <- as.numeric(data.shared[,i])
}

for(i in 4:315){
  data.shared[,i] <- round(data.shared[,i],digits=0) # make
interegs
}

write.table(data.shared,file="data.shared",quote=FALSE,row.names
=FALSE,sep="\t")

mothur > get.group(shared=data.shared)
mothur > venn(shared=data.shared, groups=coreA_father_avg-
CoreA_Mother-coreA_Daughter1_avg-coreA_Daughter3_avg-
CoreA_Daughter2)

```

Output File Names:

```

data.0.03.sharedsobs.CoreA_Mother-CoreA_Daughter2-
coreA_father_avg-coreA_Daughter1_avg.svg
data.0.03.sharedsobs.CoreA_Mother-CoreA_Daughter2-
coreA_father_avg-coreA_Daughter3_avg.svg
data.0.03.sharedsobs.CoreA_Mother-coreA_father_avg-
coreA_Daughter1_avg-coreA_Daughter3_avg.svg

```

### Pvalues (<https://stackoverflow.com/questions/18340123/calculate-venn-diagram-hypergeometric-p-value-using-r>)

```

require(gmp)
enrich_pvalue <- function(N, A, B, k)
{
  # N: total number of OTUs
  # A: unique number of OTUs in setA
  # B: unique number of OTUs in setB
  # k: overlap between sets A and B
  m <- A + k

```

```

n <- B + k
i <- k:min(m,n)

as.numeric( sum(chooseZ(m,i)*chooseZ(N-m,n-i))/
chooseZ(N,n) )
}

#---data.0.03.sharedsobs.CoreA_Mother-CoreA_Daughter2-
coreA_father_avg-coreA_Daughter1_avg.svg
#--mother:daughter1
enrich_pvalue(137, 31, 21, 54) # 0.006811284

#--mother:daughter2
enrich_pvalue(137, 46, 24, 39) # 0.5825842

#--father:daughter1
enrich_pvalue(137, 21, 23, 52) # 3.138095e-05

#--father:daughter2
enrich_pvalue(137, 36, 26, 37) # 0.156985

#---data.0.03.sharedsobs.CoreA_Mother-CoreA_Daughter2-
coreA_father_avg-coreA_Daughter3_avg.svg
#--mother:daughter1
enrich_pvalue(125, 31, 21, 54) # 0.1638773

#--mother:daughter3
enrich_pvalue(125, 33, 13, 52) # 0.002430472

#--father:daughter1
enrich_pvalue(125, 21, 23, 52) # 0.002156828

#--father:daughter3
enrich_pvalue(125, 27, 19, 46) # 0.002984995

#---data.0.03.sharedsobs.CoreA_Mother-coreA_father_avg-
coreA_Daughter1_avg-coreA_Daughter3_avg.svg
#--mother:daughter2
enrich_pvalue(136, 46, 24, 39) # 0.6223158

#--mother:daughter3
enrich_pvalue(136, 33, 13, 52) # 4.593393e-05

```

```
##--father:daughter2  
enrich_pvalue(136, 36, 26, 37) # 0.1773834
```

```
##--father:daughter3  
enrich_pvalue(136, 27, 19, 46) # 0.0001144497
```

```
#### core B ##  
abun.shared.copy <- data.shared.cp[,c(4:315)]  
coreB_father_avg <-  
colMeans(rbind(abun.shared.copy[14,],abun.shared.copy[15,]))  
coreB_father_avg <- c(0.03,"coreB_father_avg",  
312,coreB_father_avg)  
data.shared.cp <- rbind(data.shared.cp,coreB_father_avg)
```

```
coreB_mother_avg <-  
colMeans(rbind(abun.shared.copy[16,],abun.shared.copy[17,]))  
coreB_mother_avg <- c(0.03,"coreB_mother_avg",  
312,coreB_mother_avg)  
data.shared.cp <- rbind(data.shared.cp,coreB_mother_avg)
```

```
coreB_daughter_avg <-  
colMeans(rbind(abun.shared.copy[21,],abun.shared.copy[22,]))  
coreB_daughter_avg <- c(0.03,"coreB_daughter_avg",  
312,coreB_daughter_avg)  
data.shared.cp <- rbind(data.shared.cp,coreB_daughter_avg)
```

```
# now make sure data types are intact  
data.shared.cp$label <- as.numeric(data.shared.cp$label)  
data.shared.cp$Group <- factor(data.shared.cp$Group)  
for(i in 3:315){  
  data.shared.cp[,i] <- as.numeric(data.shared.cp[,i])  
}
```

```
for(i in 4:315){  
  data.shared.cp[,i] <- round(data.shared.cp[,i],digits=0) #  
make interegs  
}
```

```
write.table(data.shared.cp,file="data.shared.copy",quote=FALSE,r  
ow.names=FALSE,sep="\t")
```

```
mothur > get.group(shared=data.shared.copy)
mothur > venn(shared=data.shared.copy, groups=coreB_father_avg-
coreB_mother_avg-coreB_daughter_avg-CoreB_Son)
```

Output File Names:

```
data.shared.0.03.sharedsobs.CoreB_Son-coreB_father_avg-
coreB_mother_avg-coreB_daughter_avg.svg
data.shared.0.03.sharedsobs.CoreB_Son-coreB_father_avg-
coreB_mother_avg-coreB_daughter_avg.sharedotus
```

#### Pvalue calculation

*##--father:son*

```
require(gmp)
#enrich_pvalue(total_OTUs, unique_OTUs_in_father,
Unique_OTUs_in_son, overlap_between_father_son)
enrich_pvalue(140, 6, 68, 42) # 0.04714968
```

*##--father:daughter*

```
#enrich_pvalue(total_OTUs, unique_OTUs_in_father,
Unique_OTUs_in_daughter, overlap_between_father_daughter)
enrich_pvalue(140, 9, 48, 39) # 0.0005486819
```

*##--mother:son*

```
#enrich_pvalue(total_OTUs, unique_OTUs_in_mother,
Unique_OTUs_in_son, overlap_between_mother_son)
enrich_pvalue(140, 13, 48, 62) # 0.144163
```

*##--mother:daughter*

```
#enrich_pvalue(total_OTUs, unique_OTUs_in_mother,
Unique_OTUs_in_daughter, overlap_between_mother_daughter)
enrich_pvalue(140, 15, 27, 60) # 2.649257e-06
```

*## sub function*

```
enrich_pvalue <- function(N, A, B, k)
{
  m <- A + k
  n <- B + k
  i <- k:min(m,n)

  as.numeric( sum(chooseZ(m,i)*chooseZ(N-m,n-i))/
chooseZ(N,n) )
}
```
