# Supplementary material for: Similarity of salivary microbiome in parents and adult children
Source: PeerJ journal article supplement (doi:10.7717/peerj.8799), 2020-04-09
Supplement: peerj_codes.zip [file peerj_codes.zip]

working dir: /wrk/mishra/identify1

### 1. Unzip the .gz files

```
gunzip raw_data/*.gz
```

### 2. Check quality of all the files

```
chmod 0777 ./FastQC/fastqc
./FastQC/fastqc raw_data/*.fastq
```

```
# results are here - /wrk/mishra/identify1/raw_data/
fastQC_results
```

```
zip -r fastQC_results.zip fastQC_results
```

```
copy all the files to /wrk/mishra/identify1/mydata.
```

### 3. Trim primers

```
# check forward primer (found)
```

```
cat saliva_S7_L001_R1_001.fastq | grep CCTACGGGAGGCAGCAG | wc -l
```

```
cat saliva_S7_L001_R2_001.fastq | grep CCTACGGGAGGCAGCAG | wc -l
```

```
# reverse primer is GGACTACHVGGGTWTCTAAT. Nucleotides
corresponding to H, V, and W.
```

```
cat saliva_S7_L001_R1_001.fastq | grep GGACTACCAGGGTATCTAAT | wc -l
```

```
cat saliva_S7_L001_R2_001.fastq | grep GGACTACCAGGGTATCTAAT | wc -l
```

```
# remove forward primer
```

```
for i in $(ls /wrk/mishra/identify1/mydata/*.fastq)
```

```
do
```

```
python cutadapt -b CCTACGGGAGGCAGCAG -o ${i%}.noprimer ${i%}
```

```
done
```

```
# Remove the old files
```

```
rm -rf mydata/*.fastq
```

```
# The output files will have no primer at the end. Remove those!
```

```
for file in mydata/*.noprimer; do  
    mv -- "$file" "${file%%.noprimer}"  
done
```

```
# remove reverse primer
```

```
for i in $(ls /wrk/mishra/identify1/mydata/*.fastq)
```

```
do
```

```
python cutadapt -b GGACTACCAGGGTATCTAAT -o ${i%}.noprimer ${i%}
```

```
done
```

```
# Remove the old files
```

```
rm -rf mydata/*.fastq
```

```
for file in mydata/*.noprimer; do  
    mv -- "$file" "${file%%.noprimer}"  
done
```

```
## verify
```

```
cat saliva_S7_L001_R1_001.fastq | grep CCTACGGGAGGCAGCAG | wc -  
|
```

```
cat saliva_S7_L001_R2_001.fastq | grep GGACTACCAGGGTATCTAAT |  
wc -l
```

#### **4. Trim bad quality sequence. Note minlen - we need at least 200 long fragments (run from /wrk/mishra/identify1/mydata)**

```
for f1 in *_R1_001.fastq
do
    f2="${f1/R1/R2}"
    trimmomatic PE -threads 8 -phred33 $f1 $f2 ${f1}
    _paired.fastq ${f1}_unpaired.fastq ${f2}_paired.fastq ${f2}
    _unpaired.fastq ILLUMINACLIP:/appl/bio/trimmomatic/adapters/
    TruSeq3-PE.fa:2:30:10 LEADING:3 TRAILING:3 SLIDINGWINDOW:4:15
    MINLEN:200
done

# remove unpaired ones and old ones
rm -rf *_unpaired.fastq
```

#### **5. Quality check of trimmed samples**

```
./FastQC/fastqc mydata/*.fastq

# move fastQC results to another folder
mkdir fastQC_afterTrim
mv *.html fastQC_afterTrim/

## Move all paired.fastq files to mydata_trimmed
mkdir mydata_trimmed

cp mydata/*_paired.fastq mydata_trimmed/
```

#### **6. Remove the '\_paired.fastq' extension from the file names in my data**

```
for file in *_paired.fastq; do
    mv -- "$file" "${file%%_paired.fastq}"
done
```

## **7. Merge paired ends in /wrk/mishra/identifyl/mydata\_trimmed**

```
for i in $(ls *.fastq | rev | cut -c 13- | rev | uniq)
do
join_paired_ends.py -f ${i}R1_001.fastq -r ${i}R2_001.fastq -o
merged${i}
done
```

```
# remove unmerged files (separate file haru)
rm -rf *.fastq
```

## **8. Rename the funny merged file names by qiime (repeat manually for all)**

```
cd mergedsaliva_S61_L001_
mv fastqjoin.join.fastq saliva_S61_L001.fastq
cd ..
cp mergedsaliva_S61_L001_/saliva_S61_L001.fastq
saliva_S61_L001.fastq
rm -rf mergedsaliva_S61_L001_
```

## **9. convert all the files into fasta from fastq**

```
for i in $(ls *fastq | rev | cut -c 7- | rev | uniq)
do
paste - - - - < ${i}.fastq | sed 's/^@/>/g' | cut -f1-2 | tr '\t' '\n' > ${i}.fasta
done
```

```
# get rid of fast files
rm -rf *fastq
```

## **10. number of seqs in files (useful for normalization)**

```
count_seqs.py -i "*.fasta"
```

## **11. Merge all the samples to one file**

```
add_qiime_labels.py -i mydata_trimmed/ -m map.txt -c InputFileName -n 1 -o  
combined_fasta
```

## **12. Chimera detection. we use usearch61 method as we want to do it before taxonomy assignment and without reference**

```
#!/bin/bash -l  
#SBATCH -J chimera  
#SBATCH -o chimera.stdout  
#SBATCH -e chimera.stderr  
#SBATCH -n 1  
#SBATCH -t 12:00:00  
#SBATCH --nodes=1  
#SBATCH --mem-per-cpu=23000
```

```
identify_chimeric_seqs.py -i combined_fasta/combined_seqs.fna -m usearch61 -o  
chimeric_seqs_blast --suppress_usearch61_ref
```

-----

```
# remove chimeric sequences
```

```
filter_fasta.py -f combined_fasta/combined_seqs.fna -o seqs_chimeras_filtered.fna -s  
chimeric_seqs_blast/chimeras.txt -n
```

## **13. remove contaminants acrchaea and eukarya using mothur**

a. Classify the sequences based on training dataset downloaded from mothur references

```
mothur > classify.seqs(fasta=seqs_chimeras_filtered.fna,  
reference=trainset14_032015.pds.fasta,  
taxonomy=trainset14_032015.pds.tax, cutoff=80)
```

```
#!/bin/bash -l  
#SBATCH -J mothur  
#SBATCH -o motur.stdout  
#SBATCH -e motur.stderr  
#SBATCH -n 5
```

```
#SBATCH -t 12:00:00
#SBATCH --nodes=1
#SBATCH --mem-per-cpu=23000
module load biokit
mothur mothur_task.txt
```

Output File Names:

```
seqs_chimeras_filtered.pds.wang.taxonomy
seqs_chimeras_filtered.pds.wang.tax.summary
seqs_chimeras_filtered.pds.wang.flip.accnos
```

b. Remove mitochondrial, chloroplast, archaea, eukarya and unknowns

```
mothur > remove.lineage(fasta=seqs_chimeras_filtered.fna,
taxonomy=seqs_chimeras_filtered.pds.wang.taxonomy,taxon=Chloroplast-
Mitochondria-unknown-Archaea-Eukarya)
```

Output File Names:

```
seqs_chimeras_filtered.pds.wang.pick.taxonomy
seqs_chimeras_filtered.pick.fna
```

**14. Filter out contaminants identified as contaminants\_filter2.fasta (based on the second filtering approach. Reference : identify\_filter2.rtf in 'identification' folder).**

```
usearch -usearch_global seqs_chimeras_filtered.pick.fna -db
contaminants_filter2.fasta -id 0.99 -strand plus --notmatched cleaned_seqs.fasta
```

usearch.sh

```
#!/bin/bash -l
#SBATCH -J usearch
#SBATCH -o usearch.stdout
#SBATCH -e usearch.stderr
#SBATCH -n 1
#SBATCH -t 2:00:00
#SBATCH --nodes=1
#SBATCH --mem-per-cpu=23000
usearch -usearch_global seqs_chimeras_filtered.pick.fna -db
contaminants_filter2.fasta -id 0.99 -strand plus --notmatched cleaned_seqs.fasta
```

**15. OTU picking**

```
#!/bin/bash -l
#SBATCH -J otu
#SBATCH -o otu.stdout
#SBATCH -e otu.stderr
#SBATCH -n 1
#SBATCH -t 12:00:00
#SBATCH --nodes=1
#SBATCH --mem-per-cpu=23000
```

module load qiime

pick\_otus.py -i cleaned\_seqs.fasta -o otu

## 16. Pick representative sequences

pick\_rep\_set.py -i otu/cleaned\_seqs\_otus.txt -f cleaned\_seqs.fasta -o  
representative\_seqs.fna

**17. Align representative sequences (latest Silva from - <https://www.arb-silva.de/download/archive/qiime/>)**

**[http://qiime.org/1.6.0/tutorials/processing\\_18S\\_data.html](http://qiime.org/1.6.0/tutorials/processing_18S_data.html). - to confirm the reference fast used is the right one**

**The other files in silva123 folder (e.g., 97\_otu.fasta) are used to pick reference based OTUs.**

align\_seqs.py -i representative\_seqs.fna -t core\_aligned\_SILVA123.fasta -o aligned/

## 18. Taxonomy assignment

assign\_taxonomy.py -i representative\_seqs.fna -r 97\_otus\_16S.fasta -t  
taxonomy\_all\_levels.txt -c 0.60 -o assigned\_taxonomy

Or with home database,

assign\_taxonomy.py -i representative\_seqs.fna -r /wrk/mishra/sav/  
HOMD\_16S\_rRNA\_RefSeq\_V14.51.aligned.fasta -t /wrk/mishra/sav/  
HOMD\_16S\_rRNA\_RefSeq\_V14.5.qiime.taxonomy -c 0.60 -o  
assigned\_taxonomy\_homd

## 19. Filter alignment

**# The suggested alignment filtering settings for filter\_alignment.py (1.9.0 QIIME and later) are recommended to be -e 0.10 -g 0.80. See “Alignment Filtering” section for older versions of QIIME.**

```
filter_alignment.py -i aligned/representative_seqs_aligned.fasta -e 0.10 -g 0.80 -o  
filtered_alignment/
```

## 20. Building tree

```
make_phylogeny.py -i filtered_alignment/representative_seqs_aligned_pfiltered.fasta -o  
rep_phylo.tre
```

## 21. Make OTU table

```
make_otu_table.py -i otu/cleaned_seqs_otus.txt -t assigned_taxonomy/  
representative_seqs_tax_assignments.txt -o otu_table.biom
```

Or, based on homd database,

```
make_otu_table.py -i otu/cleaned_seqs_otus.txt -t assigned_taxonomy_homd/  
representative_seqs_tax_assignments.txt -o otu_table_homd.biom
```

##### remove singletons #####

### 21.1 Remove singletons

```
filter_otus_from_otu_table.py -i otu_table.biom -o otu_table_no_singletons.biom -n 2
```

**Or, based on homd database**

```
filter_otus_from_otu_table.py -i otu_table_homd.biom -o  
otu_table_no_singletons_homd.biom -n 2
```

## 22. Normalize OTU table

```
module load qiime/1.9.1
```

```
normalize_table.py -i otu_table_no_singletons_homd.biom -a CSS -o  
CSS_normalized_otu_table_homd.biom
```

```
# check summary  
biom summarize-table -i CSS_normalized_otu_table.biom
```

### **23. There are many metrics but we use unweighted unifrac (most popular)**

```
beta_diversity.py -i CSS_normalized_otu_table.biom -m  
unweighted_unifrac -t rep_phylo.tre -o beta_div
```

Or, using homd database,

```
beta_diversity.py -i CSS_normalized_otu_table_homd.biom -m  
unweighted_unifrac -t rep_phylo.tre -o beta_div_homd
```

### **24. Adonis**

```
compare_categories.py --method adonis -i ./beta_div/  
unweighted_unifrac_CSS_normalized_otu_table.txt -m map.txt -c  
Treatment -o adonis_out
```

Or, with homd database,

```
compare_categories.py --method adonis -i ./beta_div_homd/  
unweighted_unifrac_CSS_normalized_otu_table_homd.txt -m map.txt  
-c Treatment -o adonis_homd_out
```

```
# results same as above!!
```

### **25. PERMDISP**

```
compare_categories.py --method permdisp -i ./beta_div/
```

```
unweighted_unifrac_CSS_normalized_otu_table.txt -m map.txt -c
Treatment -o permdisp_out
```

**Or, with homd database,**

```
compare_categories.py --method permdisp -i ./beta_div_homd/
unweighted_unifrac_CSS_normalized_otu_table_homd.txt -m map.txt
-c Treatment -o permdisp_homd_out
```

## **26. PCoA plot (yaha chu)**

```
principal_coordinates.py -i beta_div/unweighted_unifrac_CSS_normalized_otu_table.txt
-o ./beta_div_coords.txt
```

```
make_2d_plots.py -i beta_div_coords.txt -m map.txt -o PCoA
```

## **27. MDS plot**

```
summarize_taxa.py -i otu_table_no_singletons.biom -a -o taxonomy_summaries/
```

Or with homd database,

```
summarize_taxa.py -i otu_table_no_singletons_homd.biom -a -o
taxonomy_summaries_homd/
```

# normalize

```
normalize_table.py -i taxonomy_summaries/otu_table_no_singletons_L6.biom -a CSS -
o CSS_normalized_otu_table_summarized.biom
```

See R file in MDS folder.

## **28. Relative abundance plot**

## summarize for relative abundance comparison

```
normalize_table.py -i otu_table.biom -a CSS -o CSS_normalized_otu_table.biom #
summarize_taxa.py -i CSS_normalized_otu_table.biom -o
```

taxonomy\_summaries\_relative/

```
## convert the boom file to R format (http://biom-format.org/documentation/biom\_conversion.html)  
biom convert -i taxonomy_summaries_relative/CSS_normalized_otu_table_L6.biom -o  
CSS_normalized_otu_table_summarized.biom.txt - -to-tsv
```

## 29. Differential abundance analysis

## (<https://github.com/alexcritschristoph/Qiime16sTutorial>) Note: use summarized otu table to avoid duplicates

```
differential_abundance.py -i taxonomy_summaries/  
otu_table_no_singletons_L6.biom -o diff_otus.txt -m map.txt -a  
DESeq2_nbinom -c Treatment -x family -y family1 -d
```

Or with homd,

```
differential_abundance.py -i taxonomy_summaries_homd/  
otu_table_no_singletons_homd_L6.biom -o diff_otus_homd.txt -m map.txt  
-a DESeq2_nbinom -c Treatment -x family -y family1 -d
```
