# Supplementary material for: Similarity of salivary microbiome in parents and adult children
Source: PeerJ journal article supplement (doi:10.7717/peerj.8799), 2020-04-09
Supplement: Table_S1.docx [file Table_S1.docx]

| **Operational Taxonomic Unit** | **Stat** | **Padjusted** |
| --- | --- | --- |
| *Synergistaceae* unclassified | -7.3808154872676 | 1.66762284764966*10-11 |
| *Atopobium* spp. | 6.44115283003831 | 6.28417833059817*10-9 |
| Human oral bacteria BD1-5 | -5.97344706711132 | 8.20765704263695*10-8 |
| *Lactobacillus* spp. | 5.79192208476946 | 1.84401376196454*10-7 |
| *Butyrivibrio* spp. | 4.49192635861786 | 0.00010744826924249 |
| *Peptostreptococcaceae* Unclassified | -4.4141529062156 | 0.000134363306731825 |
| *Solobacterium* spp. | 4.37725914643883 | 0.000141546570828339 |
| *Megasphaera* spp. | 3.82639216611577 | 0.00125306525070144 |
| *Capnocytophaga* spp. | -3.71622930326129 | 0.00178625965271426 |
| *Slackia* spp. | 3.68935550987769 | 0.00183317110352649 |
| *Bifidobacterium* spp. | 3.60381542833573 | 0.00207746602402593 |
| *Prevotella* spp. | 3.62774342664091 | 0.00207746602402593 |
| *Moryella* spp. | 3.61479440791409 | 0.00207746602402593 |
| *Clostridiales* uncultured family | -3.47069906446576 | 0.00318961870678213 |
| *Eikenella* spp. | -3.44468553682608 | 0.00318961870678213 |
| *Treponema* spp. | -3.45549391277486 | 0.00318961870678213 |
| *Actinomyces* spp. | 3.40579549660307 | 0.00349649354877567 |
| Candidate division SR1 | -3.15114617344019 | 0.00820899720377545 |
| *Peptococcus* spp. | -2.95271153098626 | 0.0151770882544323 |
| *Anaeroglobus* spp. | -2.9085185050637 | 0.0167362793442853 |
| *Dialister* spp. | 2.85002300816242 | 0.0185356122414987 |
| *Pasteurellaceae* unclassified | -2.85262356650637 | 0.0185356122414987 |
| *Fusobacterium* spp. | -2.76470473390749 | 0.0223677043943404 |
| *Actinobacillus* spp. | 2.57588363170221 | 0.037851195377557 |
| *Mogibacterium* spp. | 2.54009698023371 | 0.0405072547191099 |
| *Cryptobacterium* spp. | 2.52546116174981 | 0.0408264485245026 |
| *Clostridiales* Family XIII unclassified | -2.50630790703424 | 0.0417158992705353 |
| *Lachnospiraceae* unclassified | -2.47339682099731 | 0.0443329908323991 |
| *Staphylococcus* spp. | 2.45949550217167 | 0.0446910265024849 |
| *Mycoplasma* spp. | -2.32425433737055 | 0.0609102245083872 |
| *Bifidobacteriaceae* unclassified | 2.27507122456351 | 0.0656101540044277 |
| *Neisseria* spp. | -2.15476249447586 | 0.0847467949973194 |
| *Streptococcus* spp. | 2.08339956023919 | 0.0986192685632586 |
| *Tannerella* spp. | -1.9615996339307 | 0.128774784951411 |
| *Actinobaculum* spp. | 1.94095374693255 | 0.131744664494361 |
| *Veillonella* spp. | 1.9313192009483 | 0.131744664494361 |
| *Porphyromonas spp.* | -1.89714731105984 | 0.139265928252837 |
| Candidate division TM7 | 1.88168191558443 | 0.141048821322945 |
| *Clostridiales* Family_XIII unclassified | 1.864544117002 | 0.143434895958703 |
| *Corynebacterium* spp. | -1.80705250546809 | 0.159573060732671 |
| *Prevotellaceae* unclassified | -1.77289174739652 | 0.168378010836963 |
| *Scardovia* spp. | 1.66123492145293 | 0.204932502011363 |
| *Bulleidia* spp. | 1.53089915624901 | 0.256426878609273 |
| *Aestuariimicrobium* spp. | 1.39437716944387 | 0.320362894383997 |
| *Rothia* spp. | -1.35187799888229 | 0.32806878526881 |
| *Lachnospiraceae* unclassified | -1.36132819450511 | 0.32806878526881 |
| *Haemophilus* spp. | -1.35390259424212 | 0.32806878526881 |
| *Oribacterium* spp. | 1.31508293429885 | 0.342701473962645 |
| *Cardiobacterium* spp. | -1.30836678277671 | 0.342701473962645 |
| *Neisseriaceae* unclassified | 1.17534636604343 | 0.410076680620721 |
| *Kingella* spp. | -1.07336775221857 | 0.476337327294068 |
| Unassigned bacteria | 0.949694322694806 | 0.566880704788816 |
| *Gemella* spp. | 0.910467780594551 | 0.585308526389668 |
| *Veillonellaceae* unclassified | 0.90694216067989 | 0.585308526389668 |
| *Clostridiales* unclassified family | -0.780380999486458 | 0.625675090149152 |
| *Parvimonas* spp. | 0.757755721252263 | 0.625675090149152 |
| *Catonella* spp. | -0.779836525422117 | 0.625675090149152 |
| *Leptotrichia* spp. | -0.777968461102738 | 0.625675090149152 |
| *Neisseriaceae* unclassified | -0.771147774659251 | 0.625675090149152 |
| *Peptostreptococcaceae* unclassified | 0.723772485540723 | 0.645919154884058 |
| *Filifactor* spp. | -0.673465518484677 | 0.67175980909181 |
| *Abiotrophia* spp. | -0.518220350498138 | 0.781174158371704 |
| *Anaerococcus* spp. | 0.492817294386512 | 0.785083560778642 |
| *Streptococcaceae* unclassified | 0.477938965895177 | 0.789006194443737 |
| *Aggregatibacter* spp. | -0.437353148945581 | 0.806398357894685 |
| *Granulicatella* spp. | -0.37081639665193 | 0.856159937732391 |
| Unassigned bacteria | -0.247627507194918 | 0.90711487588156 |
| Unassigned bacilli | 0.276687284735486 | 0.90711487588156 |
| *Peptostreptococcaceae* unclassified | -0.288446460828179 | 0.90711487588156 |
| *Alysiella* spp. | 0.247916136351445 | 0.90711487588156 |
| *Firmicutes* Unclassified | -0.201049173084341 | 0.918867342398189 |
| *Mitsuokella* spp. | 0.152842191111398 | 0.940640493335124 |
| *Shuttleworthia* spp. | 0.0894581802750933 | 0.969073097952939 |
| *Johnsonella* spp. | -0.027354889049866 | 0.987332121183642 |
| *Flavobacteriaceae* unclassified | 0.215353503817065 | NA |
| *Erysipelotrichaceae* unclassified | -0.14722439979293 | NA |
| *Moraxella* spp. | 0.0668955580300727 | NA |
