# Supplementary material for: Similarity of salivary microbiome in parents and adult children
Source: PeerJ journal article supplement (doi:10.7717/peerj.8799), 2020-04-09
Supplement: Table_S2.docx [file Table_S2.docx]

| **OTU** | **Stat** | **Padjusted** |
| --- | --- | --- |
| *Lactobacillus* spp. | -6.45409479474323 | 1.00158240008095*10-8 |
| *Fretibacterium* spp. | 6.34234307252394 | 1.04096470860236*10-8 |
| *Atopobium* spp. | -6.13208265092909 | 2.65990457824073*10-8 |
| GN02 [G-2] | 5.82008532257433 | 1.35280467284957*10-7 |
| *Solobacterium* spp. | -4.88862369655286 | 1.86839829221903*10-5 |
| *Butyrivibrio* spp. | -4.84319234933199 | 1.95913217979891*10-5 |
| *Lachnospiraceae* [G-3] | 4.5371194342896 | 7.49508403213552*10-5 |
| Stomatobaculum spp. | -4.33679526344865 | 0.000166261450318532 |
| *Peptostreptococcaceae* [XI][G-7] | 4.19637141529889 | 0.000277252560309419 |
| *Peptostreptococcaceae* [XI][G-5] | 4.14105930587059 | 0.000318049109768394 |
| *Bifidobacterium* spp. | -3.85307502705096 | 0.000975564899313541 |
| *Megasphaera* spp. | -3.79912648977577 | 0.00111325345556533 |
| *Capnocytophaga* spp. | 3.73275557978932 | 0.00134034347744363 |
| *Bacteroidetes* [G-5] | 3.6243361119194 | 0.00184041245953167 |
| *Bacteroidales* [G-2] | 3.59848871852137 | 0.00184041245953167 |
| TM7 [F-1] Unclassified | -3.60108780487205 | 0.00184041245953167 |
| *Dialister* spp. | -3.54469236163852 | 0.00212721084096414 |
| *Eikenella* spp. | 3.49462849983156 | 0.00242635702207807 |
| Ruminococcaceae [G-2] | -3.27584159317344 | 0.00510104316088404 |
| *Bacteroidetes* [G-3] | 3.21313404741977 | 0.00601220150989153 |
| *Peptostreptococcaceae* [XI][G-4] | 3.20040409084809 | 0.00601220150989153 |
| *Prevotella* spp. | -3.17401139386961 | 0.0062872711652855 |
| GN02 [G-1] | 3.14548739349753 | 0.00663241363058447 |
| *Cryptobacterium* spp. | -3.10479004889174 | 0.0072992083770579 |
| *Treponema* spp. | 3.02821798378423 | 0.00905282091527167 |
| SR1 [G-1] | 2.97871560919919 | 0.0102424059954776 |
| *Actinomyces* spp. | -2.91716823985772 | 0.0116059705730353 |
| *Alloprevotella* spp. | -2.92482437708152 | 0.0116059705730353 |
| *Clostridiales* [F-1][G-1] | 2.82073852171429 | 0.0152000621001537 |
| *Alloscardovia* spp. | -2.80686618773451 | 0.0152336506136489 |
| *Fusobacterium* spp. | 2.79856158850104 | 0.0152336506136489 |
| *Bulleidia* spp. | -2.64303320256354 | 0.0236230060000929 |
| *Ruminococcaceae* [G-1] | -2.62732411651554 | 0.0239922949032303 |
| *Slackia* spp. | -2.59446988299858 | 0.0256346941567233 |
| *Lachnospiraceae* [G-2] | -2.49811070989331 | 0.0328196051814825 |
| *Mogibacterium* spp. | -2.41574111523442 | 0.0401304557074349 |
| *Staphylococcus* spp. | -2.38418820617003 | 0.0414407847808214 |
| *Peptococcus* spp. | 2.39299118611006 | 0.0414407847808214 |
| *Peptostreptococcaceae* [XI][G-2] | -2.34369763989509 | 0.0450414145300286 |
| *Streptococcus* spp. | -2.28830932984125 | 0.0508748812162072 |
| *Lachnospiraceae* [G-8] | 2.27788129109764 | 0.0510120954772045 |
| *Streptococcaceae* Unclassified | -2.20793794143074 | 0.0596874084560669 |
| *Bergeyella* spp. | 2.09296387089537 | 0.0777771847710425 |
| *Actinobaculum* spp. | -2.08248285459677 | 0.0779875372247281 |
| *Veillonella* spp. | -2.02263820812174 | 0.088136944358989 |
| *Peptostreptococcaceae* [XI][G-1] | -1.96586295913614 | 0.0986288855804254 |
| *Scardovia* spp. | -1.85351350821255 | 0.12490231588979 |
| *Porphyromonas* spp. | 1.81290675163069 | 0.133871892393926 |
| *Stenotrophomonas* spp. | -1.76410047668451 | 0.145096489789445 |
| TM7 [G-6] | -1.75735811457737 | 0.145096489789445 |
| *Neisseria* spp. | 1.69341416736933 | 0.163032406381274 |
| *Selenomonas* spp. | -1.63912847084439 | 0.179022281156862 |
| *Corynebacterium* spp. | 1.62267807008069 | 0.181670910158161 |
| *Mitsuokella* spp. | -1.57600337565595 | 0.195968561557164 |
| TM7 [G-5] | 1.55948304918045 | 0.198857319998214 |
| *Propionibacterium* spp. | -1.52013502705406 | 0.209299818081401 |
| *Tannerella* spp. | 1.51538518378556 | 0.209299818081401 |
| *Oribacterium* spp. | -1.40606026531796 | 0.253327123548147 |
| *Mycoplasma* spp. | 1.3571676687232 | 0.270369862914956 |
| *Veillonellaceae* [G-1] | 1.35214738465248 | 0.270369862914956 |
| *Rothia* spp. | 1.29260609869692 | 0.295828758838883 |
| *Gemella* spp. | -1.14958991035011 | 0.371431920172595 |
| *Campylobacter* spp. | -1.09521053422064 | 0.399286442454863 |
| *Cardiobacterium* spp. | 1.05179741312851 | 0.421032977609626 |
| *Lautropia* spp. | -1.03309598970945 | 0.426821940776593 |
| *Pseudomonas* spp. | -0.955302493025047 | 0.473137526312782 |
| *Olsenella* spp. | -0.932631152786705 | 0.481984488788975 |
| *Parvimonas* spp. | -0.920687501524083 | 0.48328899282398 |
| *Peptostreptococcus* spp. | -0.797906460225923 | 0.566566365568136 |
| *Shuttleworthia* spp. | -0.71741769712723 | 0.621810129840504 |
| *Mobiluncus* spp. | -0.636544812741282 | 0.637362792923263 |
| *Bacteroides* spp. | -0.674503535068853 | 0.637362792923263 |
| *Abiotrophia* spp. | -0.622755893966515 | 0.637362792923263 |
| *Catonella* spp. | 0.682927255705345 | 0.637362792923263 |
| *Johnsonella* spp. | 0.649680787555039 | 0.637362792923263 |
| *Lachnospiraceae* [G-7] | -0.63897851562877 | 0.637362792923263 |
| *Haemophilus* spp. | 0.631908936486933 | 0.637362792923263 |
| TM7 [G-3] | -0.549758914282798 | 0.687033285753241 |
| *Lachnospiraceae* [XIV] Unclassified | -0.504781439100348 | 0.714702994183027 |
| Unassigned Other | 0.429635408659645 | 0.754192337880151 |
| *Enterococcus* spp. | 0.423110132730617 | 0.754192337880151 |
| *Filifactor* spp. | 0.425683799778011 | 0.754192337880151 |
| *Kingella* spp. | 0.386162884757101 | 0.7752119956042 |
| *Peptostreptococcaceae* [XI][G-9] | 0.339503149211114 | 0.794696784803174 |
| *Moraxella* spp. | -0.34208891440522 | 0.794696784803174 |
| *Ottowia* spp. | 0.272130020737771 | 0.835290169380453 |
| *Aggregatibacter* spp. | -0.26644830861666 | 0.835290169380453 |
| *Lachnoanaerobaculum* spp. | -0.244262125116703 | 0.843710897418313 |
| *Peptostreptococcaceae* [XI][G-6] | 0.20189743513477 | 0.868311409745663 |
| *Granulicatella* spp. | 0.107298439102738 | 0.930594099230161 |
| *Leptotrichia* spp. | 0.0998304338996341 | 0.930594099230161 |
| TM7 [G-1] | -0.043120118205251 | 0.965605782204658 |
